# Supplementary material for: Tunable catalytic activities and selectivities of metal ion doped TiO2nanoparticles – oxidation of organic compounds
Source: Royal Society of Chemistry journal article supplement (doi:10.1039/c3dt51987b), 2013-10-11
Supplement: c3dt51987b.pdf [file c3dt51987b.pdf]

Electronic Supporting Information

**Tunable Catalytic Activities and Selectivities of Metal Ions Doped TiO<sub>2</sub>  
Nanoparticles – Oxidation of Organic Compounds**

*Anqi Wang, Huanwang Jing\**

*State Key Laboratory of Applied Organic Chemistry, College of Chemistry and Chemical*

*Engineering*

*Lanzhou University, 222 South Tianshui Road, Lanzhou, Gansu 730000, P.R. China*

*\*Corresponding author. Tel.: (+86) 0931-8912585; Fax: (+86) 0931-8912582.*

*E-mail address: hwjing@lzu.edu.cn*

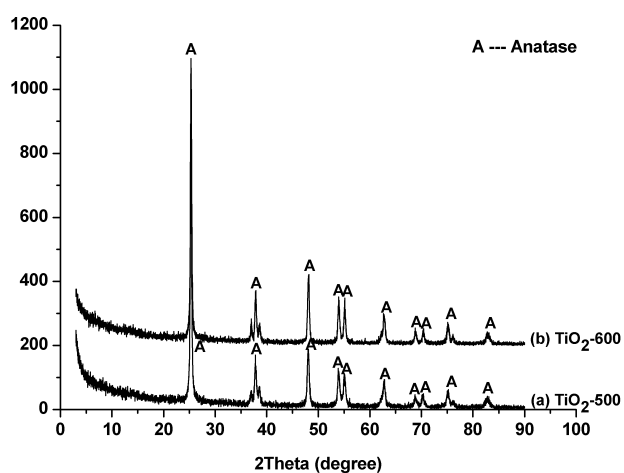

Figure S1 XRD patterns of (a) TiO<sub>2</sub>-500, (b) TiO<sub>2</sub>-600

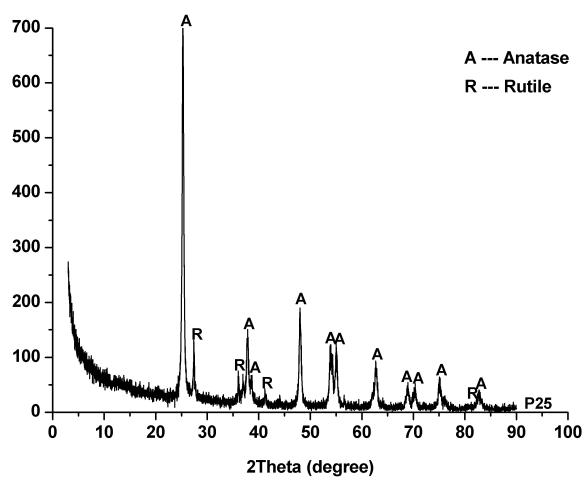

Figure S2 XRD patterns of P25 TiO<sub>2</sub>

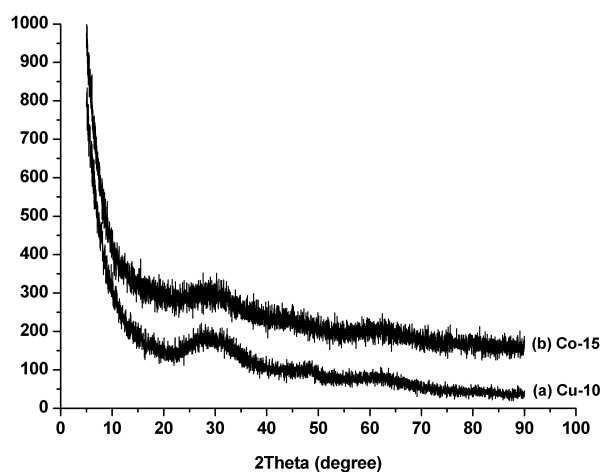

Figure S3 XRD patterns of recycled catalysts (a) Cu-10, (b) Co-15

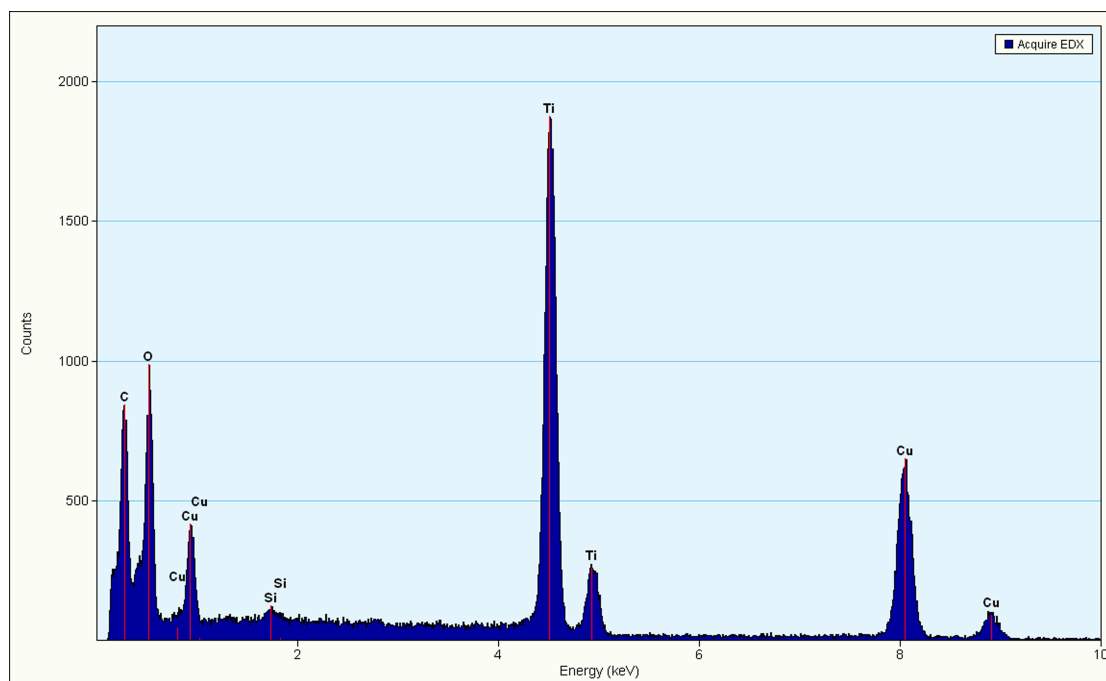

Figure S4 EDX spectrum data of Cu-10 (dark color area)

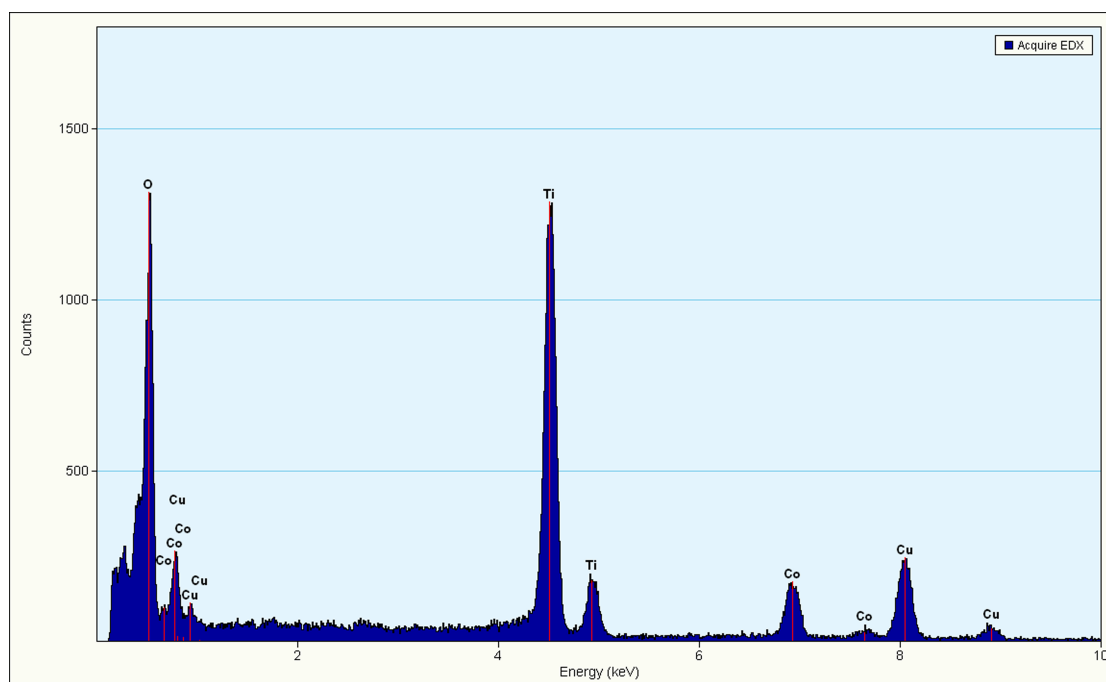

Figure S5 EDX spectrum data of Co-15 (dark color area)

**Table S1** Oxidation of styrene catalyzed by TiO<sub>2</sub> nano-catalysts <sup>a</sup>

| Entry | Cat.             | Conv.(%) <sup>b</sup> | Benzaldehyde         |                       | Styrene oxide |          |
|-------|------------------|-----------------------|----------------------|-----------------------|---------------|----------|
|       |                  |                       | Sel.(%) <sup>b</sup> | Yield(%) <sup>c</sup> | Sel.(%)       | Yield(%) |
| 1     | —                | 3.3                   | 89.4                 | 3.0                   | 10.6          | 0.3      |
| 2     | P25              | 16.3                  | 72.0                 | 11.7                  | 28.0          | 4.6      |
| 3     | TiO <sub>2</sub> | 14.7                  | 63.0                 | 9.3                   | 37.0          | 5.4      |
| 4     | Cr-10            | 50.4                  | 68.8                 | 34.6                  | 31.2          | 15.8     |
| 5     | Mn-10            | 65.7                  | 85.9                 | 56.5                  | 14.1          | 9.2      |
| 6     | Fe-10            | 55.8                  | 90.8                 | 50.7                  | 9.2           | 5.1      |
| 7     | V-10             | 17.7                  | 70.8                 | 12.5                  | 29.2          | 5.2      |
| 8     | Zn-10            | 31.4                  | 55.9                 | 17.5                  | 44.1          | 13.9     |
| 9     | Ni-10            | 8.4                   | 59.1                 | 5.0                   | 40.9          | 3.4      |
| 10    | Ag-10            | 25.4                  | 87.4                 | 22.2                  | 12.6          | 3.2      |
| 11    | Cu-10            | 97.5                  | 99.4                 | 96.9                  | 0.6           | 0.6      |
| 12    | Co-10            | 80.9                  | 80.2                 | 64.9                  | 19.8          | 16.0     |

<sup>a</sup> Reaction conditions: catalyst 0.15 g, styrene 5 mmol, TBHP 12.5 mmol, acetonitrile 4 mL, reflux, 4 hours.

<sup>b</sup> Determined by GC with FID detector.

<sup>c</sup> Yield (%) = Conversion (%) × Selectivity (%).

**Table S2** Solvent effect on the oxidation of styrene <sup>a</sup>

| Entry          | Cat.  | Sol.         | Conv.(%) <sup>b</sup> | Benzaldehyde         |                       | Styrene oxide |          |
|----------------|-------|--------------|-----------------------|----------------------|-----------------------|---------------|----------|
|                |       |              |                       | Sel.(%) <sup>b</sup> | Yield(%) <sup>c</sup> | Sel.(%)       | Yield(%) |
| 1              | Cu-10 | acetonitrile | 97.5                  | 99.4                 | 96.9                  | 0.6           | 0.6      |
| 2              | Cu-10 | ethanol      | 44.9                  | 52.0                 | 23.3                  | 48.0          | 21.6     |
| 3              | Cu-10 | acetone      | 22.7                  | 33.2                 | 7.5                   | 66.8          | 15.2     |
| 4 <sup>d</sup> | Cu-10 | DMF          | 59.9                  | 59.7                 | 35.8                  | 40.3          | 24.1     |
| 5              | Cu-10 | 1,4-dioxane  | 31.3                  | 30.3                 | 9.5                   | 69.7          | 21.8     |
| 6              | Co-15 | acetonitrile | 94.9                  | 15.3                 | 14.5                  | 84.7          | 80.4     |
| 7              | Co-15 | ethanol      | 41.7                  | 34.2                 | 14.3                  | 65.8          | 27.4     |
| 8              | Co-15 | acetone      | 58.9                  | 40.0                 | 23.6                  | 60.0          | 35.3     |
| 9 <sup>d</sup> | Co-15 | DMF          | 63.9                  | 45.2                 | 28.9                  | 54.8          | 35.0     |
| 10             | Co-15 | 1,4-dioxane  | 56.9                  | 59.6                 | 33.9                  | 40.4          | 23.0     |

<sup>a</sup> Reaction conditions: catalyst 0.15 g, styrene 5 mmol, TBHP 12.5 mmol, solvent 4 mL, reflux, 4 hours.

<sup>b</sup> Determined by GC with FID detector.

<sup>c</sup> Yield (%) = Conversion (%) × Selectivity (%).

<sup>d</sup> Reactions proceeded at 140 °C.
